# Supplementary material for: KHK, PNPLA3 and PPAR as Novel Targets for the Anti-Steatotic Action of Bempedoic Acid
Source: MDPI journal article supplement (doi:10.3390/biomedicines10071517), 2022-06-27
Supplement: s1 [file s1]

**Table S1.** Genes, GenBank Number, SYBR Green primer sequences and PCR products.

| Gene           | GenBank TM     | Primer Sequences                                                  | PCR Product |
|----------------|----------------|-------------------------------------------------------------------|-------------|
| <i>Acly</i>    | NM_016987.2    | F: 5'-CCCTTCGTCCCCACAGT-3'<br>R: 5'-TCTCCTTCCCGGTAGCAT-3'         | 65 bp       |
| <i>Acaa2</i>   | NM_130433.1    | F: 5'-CCCTGCTATCATGGGGATCG-3'<br>R: 5'-GAGCAAATGCTTCATTCACGTCT-3' | 110 bp      |
| <i>Acadl</i>   | NM_012819.2    | F: 5'-CCCGATTGCAAAAGCCTACG-3'<br>R: 5'-ACTGACGATCTGTCTTGCGA-3'    | 97 bp       |
| <i>Acox</i>    | NM_017340.2    | F: 5'-GTGAGGCGCCAGTCTGAAA-3'<br>R: 5'-ACTGCTGGGTTTGAATAATCCA-3'   | 70 bp       |
| <i>Acsl1</i>   | NM_012820.2    | F: 5'-TGTGGGGTGGAAATCATCGG-3'<br>R: 5'-TTGGGGTTGCCTGTAGTTCC-3'    | 131 bp      |
| <i>Acsvl1</i>  | NM_031736.2    | F: 5'-ATGGCGTGCCTCAACTACAA-3'<br>R: 5'-GGGTTGGAAGAACCTCCTCG-3'    | 124 bp      |
| <i>Chrebpα</i> | NM_001393706.1 | F: 5'-AGCATCGATCCGACACTCAC-3'<br>R: 5'-TGTTCAAGCCGAATCTTGTC-3'    | 130 bp      |
| <i>Chrebpβ</i> | NM_133552.2    | F: 5'-TGTTCAAGCCGAATCTTGTC-3'<br>R: 5'-TGTTCAAGCCGAATCTTGTC-3'    | 125 bp      |
| <i>Cpt1b</i>   | NM_013200.2    | F: 5'-CAGTGTGCCAGCCACAATTC-3'<br>R: 5'-TAGGCTTCGTCATCCAGCAA-3'    | 66 bp       |
| <i>FadS2</i>   | NM_031344.2    | F: 5'-TCATCGACCGCAGGTCTAC-3'<br>R: 5'-CGGAAGGCATCCGTAGCAT-3'      | 105 bp      |
| <i>Gck</i>     | NM_001270849.1 | F: 5'-ACTGCCGAGATGATGAAGCA-3'<br>R: 5'-GCCCTTGGTCCAATTGAGGA-3'    | 70 bp       |
| <i>Ldlr</i>    | NM_175762.3    | F: 5'-AGACCCAGAGCCATCGTAGT-3'<br>R: 5'-TTGATCTTGGCAGGTGTCCC-3'    | 77 bp       |
| <i>L-pk</i>    | NM_012624.3    | F: 5'-GAACATTGCACGACTCAACTTCT-3'<br>R: 5'-CGGATGTTGGCGATGGAT-3'   | 69 bp       |
| <i>Mttp</i>    | NM_001107727.1 | F: 5'-TCTCTGCTGACCCGCATTTT-3'<br>R: 5'-GCTACCGGATCTCATCGGAC-3'    | 122 bp      |
| <i>Pcsk9</i>   | NM_199253.2    | F: 5'-ACATGTCACAGAGTGGGACG-3'<br>R: 5'-TCCCGGTTACAGCATCATAGC-3'   | 73 bp       |
| <i>Pnpla3</i>  | NM_001282324.1 | F: 5'-AGTCTCCCTCTCGATCACATCA-3'<br>R: 5'-TGTTGAAGAACGGGTGGAGG-3'  | 94 bp       |
| <i>Tbp</i>     | NM_001004198.1 | F: 5'-TGGGATTGTACCACAGCTCCA-3'<br>R: 5'-CTCATGATGACTGCAGCAAACC-3' | 132 bp      |
| <i>Vldlr</i>   | NM_013155.2    | F: 5'-CCAGGAACAGGACTGCAGAG-3'<br>R: 5'-GCCACCGTTATTGACCAAGC-3'    | 82 bp       |

**Table S2.** Antibodies used in western blot analysis.

| Antibody                     | Reference Number       |
|------------------------------|------------------------|
| ACLY                         | Cell Signaling (#4332) |
| AMPK                         | Cell Signaling (#2532) |
| p-AMPK (Thr <sup>172</sup> ) | Cell Signaling (#2535) |
| ACC                          | Cell Signaling (#3662) |
| p-ACC (Ser <sup>79</sup> )   | Cell Signaling (#3661) |
| β3-AR                        | Santa Cruz (sc-515763) |
| β-ACTIN                      | Sigma Aldrich (A5441)  |
| β-TUBULIN                    | Sigma-Aldrich (T4026)  |
| ChREBP (P-13)                | Santa Cruz (sc-21189)  |
| KHK                          | Santa Cruz (sc-50029)  |

---

|                |                         |
|----------------|-------------------------|
| PGC-1 $\alpha$ | Cayman (101707)         |
| PNPLA3         | Invitrogen (PA5-117066) |
| SREBP1c        | Santa Cruz (sc-366)     |
| UCP1 (A-6)     | Santa Cruz (sc-518024)  |
| VINCULIN       | Santa Cruz (sc-73614)   |

---
